# Supplementary material for: Risk indicators affecting honeybee colony survival in Europe: one year of surveillance
Source: Springer Nature journal article supplement (doi:10.1007/s13592-016-0440-z), 2016-05-01
Supplement: MOESM1 [file 13592_2016_440_MOESM1_ESM.pdf]

## **Risk indicators affecting honeybee colony survival in Europe: one year of surveillance**

Marie-Pierre Chauzat<sup>\*1,2</sup>, Antoine Jacques, EPILOBEE consortium, Marion Laurent, Stéphanie Bougeard, Pascal Hendrikx and Magali Ribière-Chabert

\*Corresponding author:

<sup>1</sup>Unit of coordination and support to surveillance, ANSES, Scientific Affairs Department for Laboratories, Maisons-Alfort, France

<sup>2</sup>Unit of Honeybee Pathology, ANSES, European Union and National Reference Laboratory for honeybee health, Sophia Antipolis, France

email: Marie-pierre.CHAUZAT@anses.fr

**Table S1:** The 138 variables of the EPILOBEE database

BEEKEEPER table

| Variables           | Definitions                                                                                                                    |
|---------------------|--------------------------------------------------------------------------------------------------------------------------------|
| Surname             | Surname of the beekeeper.                                                                                                      |
| Name                | Name of the beekeeper.                                                                                                         |
| Postal_adress       | Postal address of the beekeeper home.                                                                                          |
| Zipcode             | Zip code of the beekeeper home.                                                                                                |
| City                | City of the beekeeper home.                                                                                                    |
| Tel                 | Phone number of the beekeeper.                                                                                                 |
| Fax                 | Fax number of the beekeeper.                                                                                                   |
| E.mail              | E-mail address of the beekeeper.                                                                                               |
| Identification      | National identification of the beekeeper.                                                                                      |
| Age                 | Age of the beekeeper.                                                                                                          |
| Activity            | Typology of the beekeeper activity.                                                                                            |
| Beekeep_for         | Years of experience of the beekeeper in beekeeping.                                                                            |
| Org_member          | Was the beekeeper member of a regional / national beekeeping organization?                                                     |
| Qualif              | Did the beekeeper have any formal qualification in beekeeping?                                                                 |
| Training            | Has the beekeeper attended any beekeeping and/or bee health training in the last 3 years?                                      |
| Continue            | Did the beekeeper plan to continue his / her bee activity for more than 2 years?                                               |
| Follower            | In case the beekeeper planned to leave his/her apiary, was anybody likely to take over his/her apiary?                         |
| Coop_treat          | Was the beekeeper part of a cooperative treatment against varroa with neighboring beekeepers?                                  |
| Apiaries            | Total number of apiaries owned by the beekeeper.                                                                               |
| Bee_population_size | Total number of colonies owned by the beekeeper.                                                                               |
| Country             | Country where the apiary was located.                                                                                          |
| Nuts1_apiary        | Regional division (at the Nuts 1 level) where the apiary was located.                                                          |
| Nuts2_apiary        | Regional division (at the Nuts 2 level) where the apiary was located.                                                          |
| Nuts3_apiary        | Regional division (at the Nuts 3 level) where the apiary was located.                                                          |
| LAU                 | Local Administrative Unit where the apiary was located.                                                                        |
| Lat                 | Latitude of the apiary location.                                                                                               |
| Long                | Longitude of the apiary location.                                                                                              |
| Migration           | Did the apiary migrate at least one time during the past seasonal period, before the winter period of after the winter period? |
| Apiary_size         | Total number of colonies in the apiary randomly selected.                                                                      |
| Breed               | Which was the honeybee strains/subspecies of honeybees in the apiary?                                                          |
| Production          | Production targeted by the beekeeper.                                                                                          |
| Env_farmland        | Was there a farmland environment surrounding the apiary?                                                                       |
| Type_farmland       | Type of the farmland environment surrounding the apiary.                                                                       |
| Env_orchads         | Was there an orchards' environment surrounding the apiary?                                                                     |
| Specie_orchards     | Specie of orchards surrounding the apiary.                                                                                     |
| Env_flora           | Was there a floral environment surrounding the apiary?                                                                         |
| Env_wood            | Was there a wooded environment surrounding the apiary?                                                                         |
| Env_town            | Was there an urban environment surrounding the apiary?                                                                         |
| Env_indus           | Was there an industrial environment surrounding the apiary?                                                                    |
| Env_other           | Was there another environment surrounding the apiary?                                                                          |
| Apiarist_book       | Had the beekeeper an apiarist book?                                                                                            |
| Queen_import        | Was the queen imported from outside of Europe?                                                                                 |
| Queen_import_or     | Country of origin of the queen                                                                                                 |
| Queen_import_or2    | Second country of origin of the queen                                                                                          |

|             |                                                        |
|-------------|--------------------------------------------------------|
| Harbor      | Was the apiary located near an international harbor?   |
| Airport     | Was the apiary located near an international airport?  |
| Other_risk  | Another risk that could have affected the apiary.      |
| Participate | Did the beekeeper participate in EPILOBEE second year? |

#### COLONY table

| Variables | Definitions                                                         |
|-----------|---------------------------------------------------------------------|
| Field_ID  | Field identification of the selected colonies.                      |
| Reason    | Whether the colony was randomly selected or part of extra sampling. |
| Year      | Year of the EPILOBEE program.                                       |

#### DISEASE table

| Variables | Definitions                                              |
|-----------|----------------------------------------------------------|
| Suspected | The disease suspected on the field by the bee inspector. |
| Remark    | Remark on the disease suspected.                         |
| Date      | Date of the visit.                                       |

#### HEALTH table

| Variables        | Definitions                                                                                                                               |
|------------------|-------------------------------------------------------------------------------------------------------------------------------------------|
| Type_event       | Which type of event was experienced in the apiary before the first visit of EPILOBEE program?                                             |
| Other            | Other types of event than the ones listed that were experienced in the apiary before the first visit of EPILOBEE program.                 |
| Disease_event    | Which disease was suspected for the event experienced in the apiary before the first visit of EPILOBEE program?                           |
| Other_D          | Other disease than the ones listed that was suspected for the event experienced in the apiary before the first visit of EPILOBEE program. |
| Percent_affected | Percentage of the colonies affected by the event.                                                                                         |
| Lab              | Were laboratory analyses performed?                                                                                                       |
| Conclusion       | Results of the laboratory analyses on the disease affecting the apiary.                                                                   |
| Other_C          | Other results of the laboratory analyses than the ones listed.                                                                            |
| Treatment        | Treatment/sanitary measures applied to the apiary                                                                                         |

#### MANAGEMENT table

| Variables         | Definitions                                                |
|-------------------|------------------------------------------------------------|
| Management        | Main management objective of the beekeeper.                |
| Swarm_bought      | Number of swarm(s) bought by the beekeeper.                |
| Swarm_or          | Country of origin of the swarm(s) bought.                  |
| Swarm_produced    | Number of swarm(s) produced by the beekeeper.              |
| Queen_bought      | Number of queen(s) bought by the beekeeper.                |
| Queen_or          | Country of origin of the queen(s) bought.                  |
| Queen_produced    | Number of queen(s) produced by the beekeeper.              |
| Date_action       | Date of the actions of management                          |
| Colonie_divided   | Number of colonies divided by the beekeeper in the apiary. |
| Colonie_naturally | Number of colonies that have naturally swarmed.            |
| Colonie_merged    | Number of colonies merged by the beekeeper in the apiary.  |

#### MIGRATION table

| Variables        | Definitions                                                                                      |
|------------------|--------------------------------------------------------------------------------------------------|
| Start            | Date for the start of the migration.                                                             |
| End              | Date for the end of migration.                                                                   |
| Place2           | Regional division (at the Nuts 2 level) where the apiary was migrated.                           |
| Place3           | Regional division (at the Nuts 3 level) where the apiary was migrated.                           |
| MidSeason_Target | What kind of nectar flow was targeted by the beekeeper during the past seasonal period?          |
| Other            | Other nectar flow than the ones listed targeted by the beekeeper during the past seasonal period |
| colonie          | Percentage of the colonies that migrated.                                                        |

#### RESULTS table

| Variables     | Definitions                                     |
|---------------|-------------------------------------------------|
| Apiary        | Was it an analysis for the whole apiary?        |
| Lab_ID        | Laboratory identification of the analyses.      |
| Analysis      | Disease targeted                                |
| Technique     | Analytical technique used.                      |
| Result        | Result of the analysis.                         |
| Detail        | Details related to the result of the analysis.  |
| Comment       | Comments related to the result of the analysis. |
| Date          | Date of the analysis.                           |
| Number_varroa | Number of varroa per 100 bees.                  |
| Number_nosema | Number of <i>Nosema</i> spores per bee.         |

#### SAMPLE table

| Variables | Definitions                          |
|-----------|--------------------------------------|
| Reason    | Type of sampling.                    |
| Nature    | Nature of the sample.                |
| DateV     | Date of the visit.                   |
| Field_ID  | Field identification of the samples. |

#### STRENGTH table

| Variables | Definitions                                                                           |
|-----------|---------------------------------------------------------------------------------------|
| Dead      | Was the colony dead?                                                                  |
| Force     | Strength of the colony (From 1-very weak to 5-very strong).                           |
| Date      | Date of the visit.                                                                    |
| Future    | Other event explaining why the colony was not in the apiary anymore during the visit? |
| Type      | Whether the colony was randomly selected or part of extra sampling                    |
| Varroosis | Was varroosis observed/diagnosed on the field?                                        |

#### SYMPTOM table

| Variables | Definitions                     |
|-----------|---------------------------------|
| Symptom   | Symptoms observed on the field. |
| Remark    | Remark on the symptoms observed |

|      |                    |
|------|--------------------|
| Date | Date of the visit. |
|------|--------------------|

#### TREATMENT table

| Variables           | Definitions                                |
|---------------------|--------------------------------------------|
| Date_treat          | Date of the treatment.                     |
| Name_treat          | Commercial name of the treatment.          |
| Ingredient          | Active ingredient composing the treatment. |
| Posology            | Dose rate of the treatment.                |
| Duration            | Duration of the treatment (in days).       |
| Remark              | Remark on the treatment.                   |
| Frequence           | Frequency of the treatment (in weeks).     |
| Treatment_correctly | Was the treatment was correctly applied?   |

#### VISIT table

| Variables      | Definitions                                                                                                |
|----------------|------------------------------------------------------------------------------------------------------------|
| Date           | Date of the visit.                                                                                         |
| Rank           | Rank of the visit.                                                                                         |
| Inspected      | Number of colonies inspected.                                                                              |
| Visitor1       | Surname of the bee inspector #1.                                                                           |
| Visitor2       | Surname of the bee inspector #2.                                                                           |
| Km             | Number of kilometers covered for the visit.                                                                |
| Time           | Number of hours spent to visit the apiary.                                                                 |
| Random         | Number of colonies randomly selected at autumn visit.                                                      |
| Random_v1_rap  | Reminder of the number of colonies randomly selected at autumn visit.                                      |
| Alive_v2       | Number of colonies still alive at spring visit.                                                            |
| Dead_v1_v2     | Number of dead colonies between the autumn and spring visits.                                              |
| Merged_v1_v2   | Number of merged colonies between the autumn and spring visits.                                            |
| sold_v1_v2     | Number of sold colonies between the autumn and spring visits.                                              |
| Divided_v1_v2  | Number of divided colonies between the autumn and spring visits.                                           |
| Alive_v3       | Number of colonies still alive at summer visit.                                                            |
| Dead_v2_v3     | Number of dead colonies between the spring and summer visits.                                              |
| Merged_v2_v3   | Number of merged colonies between the spring and summer visits.                                            |
| sold_v2_v3     | Number of sold colonies between the spring and summer visits.                                              |
| Divided_v2_v3  | Number of divided colonies between the spring and summer visits.                                           |
| Previous_visit | Was the apiary located at the same place as the previous visit?                                            |
| Moving_apiary  | In case the apiary was moved since the previous visit, reasons of moving the apiary                        |
| During_visit   | Total number of colonies in the apiary randomly selected during the visit.                                 |
| Visited_apiary | Colony mortality rate according to the beekeeper since the last visit, in the apiary visited.              |
| Farm_general   | Colony mortality rate according to the beekeeper since the last visit, in her/his livestock in general.    |
| Produce_v1_v2  | Number of colonies divided [used to produce one or several swarm(s)] between the autumn and spring visits. |
| Produce_v2_v3  | Number of colonies divided [used to produce one or several swarm(s)] between the spring and summer visits. |

**Table S2:** Data cleaning steps and edits. Cleansing steps were implemented to discard invalid data. Edits were applied to keep as much data as possible in the statistical analysis. V1: visit 1, V2: visit 2, V3: visit 3

|                |                                                                                                                                                                                                                                                                                |
|----------------|--------------------------------------------------------------------------------------------------------------------------------------------------------------------------------------------------------------------------------------------------------------------------------|
| Cleaning steps | Removal of records when the number of randomly selected colonies at visit 1 was NA                                                                                                                                                                                             |
|                | Removal of records when the number of randomly selected colonies at visit 1 was different from the number of randomly selected colonies reported at visit 2                                                                                                                    |
|                | Removal of records when the number of living colonies at visit 2 was NA                                                                                                                                                                                                        |
|                | Removal of records when the number of living colonies at visit 3 was NA                                                                                                                                                                                                        |
|                | Removal of records when the number of dead colonies between v1 and v2 was NA                                                                                                                                                                                                   |
|                | Removal of records when the number of dead colonies between v2 and v3 was NA                                                                                                                                                                                                   |
|                | Removal of records when the number of randomly selected colonies at visit 1 was different from the addition of the number of colonies living at v2, the number of dead colonies between v1 and v2 and the number of colonies sold between v1 and v2                            |
|                | Removal of records when the number of randomly selected colonies at visit 2 was different from the addition of the number of colonies living at v3, the number of dead colonies between v2 and v3 and the number of colonies sold between v2 and v3                            |
|                | Removal of records when the number of colonies in the selected apiary during the visit was NA                                                                                                                                                                                  |
|                | Removal of records when the number of colonies randomly selected was larger than the number of colonies in the apiary during the visit                                                                                                                                         |
|                | Removal of records when the beekeeper declared owning only one apiary and that the total number of colonies was different from the number of colonies in the selected apiary during the visit                                                                                  |
|                | Removal of records when the beekeeper declared owning more than one apiary and that the total number of colonies was less than the number of colonies in the apiary during the visit                                                                                           |
| Edits          | If the number of colonies sold between v1 and v2 was NA, then NA was replaced by 0                                                                                                                                                                                             |
|                | If the number of colonies sold between v2 and v3 was NA, then NA was replaced by 0                                                                                                                                                                                             |
|                | If the number of colonies randomly selected was equal to the addition of the number of living colonies at v2 and the number colonies sold between v1 and v2 and the number of dead colonies between v1 and v2 was NA, then the number of dead colonies between v1 and v2 was 0 |
|                | If number of living colonies at V2 was equal to the addition of the number of living colonies at v3 and the number colonies sold between v2 and v3 and the number of dead colonies between v2 and v3 was NA, then the number of dead colonies between v2 and v3 was 0          |
